# Supplementary material for: Individual-patient prediction of meningioma malignancy and survival using the Surveillance, Epidemiology, and End Results database
Source: Springer Nature journal article supplement (doi:10.1038/s41746-020-0219-5), 2020-01-30
Supplement: 41746_2020_219_MOESM1_ESM.pdf [file 41746_2020_219_MOESM1_ESM.pdf]

# Supplementary Information

## Supplementary Figures

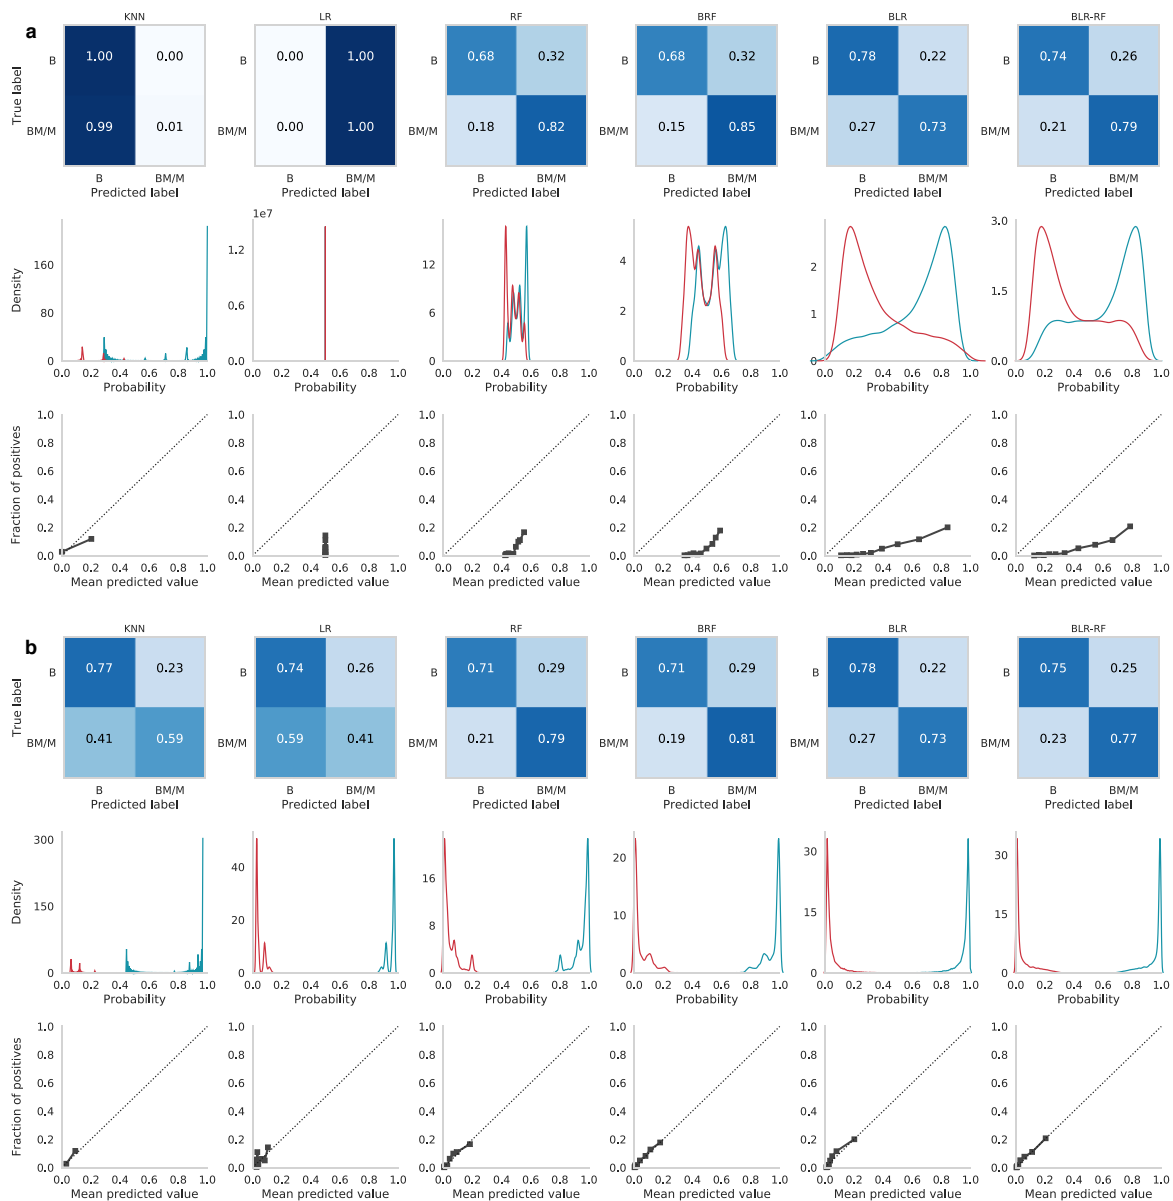

**Supplementary Fig. 1.** Exploratory model comparison for initial models after hyperparameter optimization but prior to probability calibration **(a)**, and after calibration **(b)**. KNN: K-Nearest Neighbors, LR: Logistic regression, RF: Random Forests, BRF: Balanced Random Forest, BLR: Balanced Logistic Regression, BLR-RF: Balanced Logistic Regression-Random Forests. For (a) and (b), the first row contains confusion matrices illustrating predicted vs. true labels, as evaluated on the test set. Values are normalized across each row. B: Benign, BM/M: Borderline malignancy/Malignant. The second row consists of kernel density plots illustrating the distribution of predicted probabilities for the benign (blue) and non-benign (red) meningioma classes. The third row consists of calibration diagrams plotting predicted probabilities against the true observed distribution of each class in the test dataset.

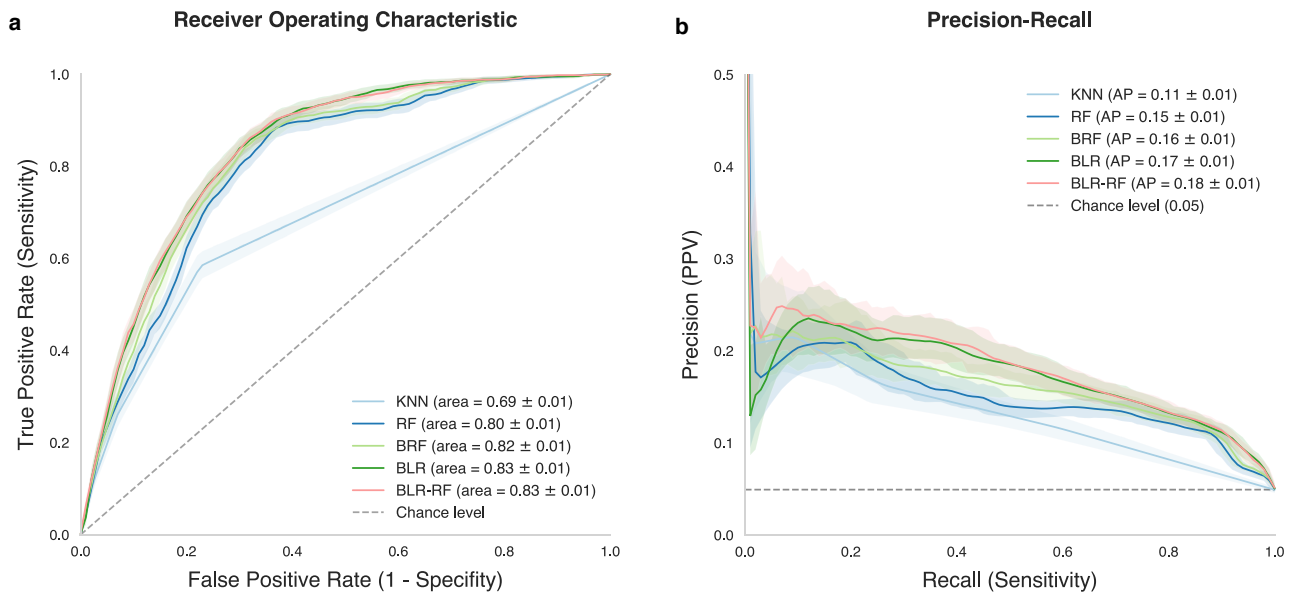

**Supplementary Fig. 2.** Receiver Operating Characteristic curve **(a)** and Precision-Recall curve **(b)** for Benign vs. Borderline Malignant/Malignant meningioma classification. The grey dashed line indicates chance level performance and the shaded outlines represents 95% confidence intervals. KNN: K-Nearest Neighbors, LR: Logistic regression, RF: Random Forests, BRF: Balanced Random Forest, BLR: Balanced Logistic Regression, BLR-RF: Balanced Logistic Regression-Random Forests

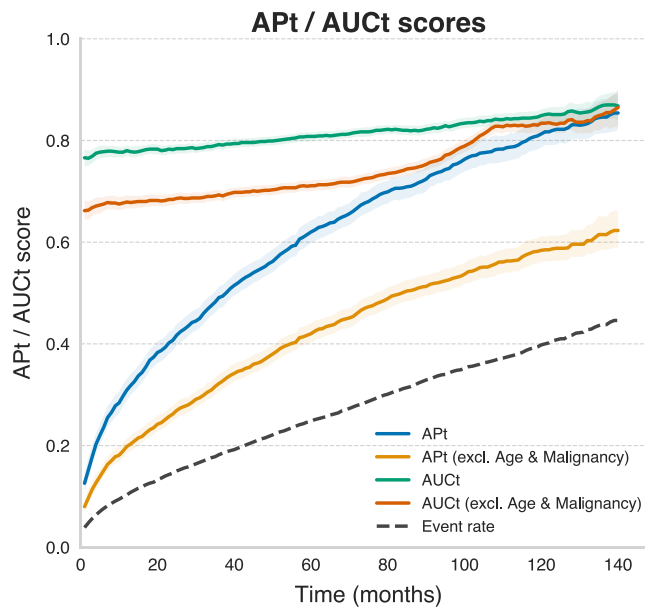

**Supplementary Fig. 3.** Time-dependent area under the curve (AUCt) and average-precision (APt) for the survival model including or excluding age and malignancy as features of interest, as evaluated on the test set. The event rate/chance level is represented by the dashed grey line. Shaded outlines represent 95% confidence intervals.

## Supplementary Notes

### Supplementary Note 1. SEER\*Stat search query.

Database Name:

Incidence - SEER 18 Regs Research Data + Hurricane Katrina Impacted Louisiana Cases, Nov 2017 Sub (1973-2015 varying)

Selection:

{Site and Morphology.Primary Site - labeled} = 'C70.0-Cerebral meninges','C70.1-Spinal meninges','C70.9-Meninges, NOS','C71.0-Cerebrum','C71.1-Frontal lobe','C71.2-Temporal lobe','C71.3-Parietal lobe','C71.4-Occipital lobe','C71.5-Ventricle, NOS','C71.6-Cerebellum, NOS','C71.7-Brain stem','C71.8-Overlapping lesion of brain','C71.9-Brain, NOS','C72.0-Spinal cord','C72.1-Cauda equina','C72.2-Olfactory nerve','C72.3-Optic nerve','C72.4-Acoustic nerve','C72.5-Cranial nerve, NOS','C72.8-Overlapping lesion of brain & CNS','C72.9-Nervous system, NOS','C75.1-Pituitary gland','C75.2-Craniopharyngeal duct','C75.3-Pineal gland'

AND {Site and Morphology.ICD-O-3 Hist/behav} = '9530/0: Meningioma, NOS','9530/1: Meningiomatosis, NOS','9530/3: Meningioma, malignant','9531/0: Meningothelial meningioma','9531/1: Meningothelial meningioma, borderline','9531/3: Meningothelial meningioma, malignant','9532/0: Fibrous meningioma','9532/3: Fibrous meningioma, malignant','9533/0: Psammomatous meningioma','9533/3: Psammomatous meningioma, malignant','9534/0: Angiomatous meningioma','9534/3: Angiomatous meningioma, malignant','9537/0: Transitional meningioma','9537/3: Transitional meningioma, malignant','9538/0: Clear cell meningioma, benign','9538/1: Clear cell meningioma','9538/3: Papillary meningioma',

Select Only: Cases in Research Database
